# Supplementary material
Source: MDPI journal article supplement (https://www.mdpi.com/1999-4907/12/6/804)
Supplement: s1 [file s1]

**Table S1.** Cross-species transferability of developed gSSRs markers in different *Dalbergia* species

[illegible]

|         |    |    |    |    |    |    |    |    |    |         |
|---------|----|----|----|----|----|----|----|----|----|---------|
| Dhup141 | √  | √  | √  | √  | √  | √  | √  | √  | √  | 100.00% |
| Dhup142 | ×  | ×  | ×  | ×  | ×  | ×  | ×  | ×  | ×  | 0.00%   |
| Dhup144 | √  | ×  | ×  | √  | ×  | √  | √  | ×  | ×  | 44.44%  |
| Dhup153 | ×  | ×  | ×  | √  | ×  | ×  | ×  | ×  | √  | 22.22%  |
| Dhup159 | √  | ×  | ×  | ×  | √  | ×  | √  | ×  | ×  | 33.33%  |
| Dhup163 | √  | √  | √  | ×  | √  | √  | ×  | √  | ×  | 66.67%  |
| Dhup164 | √  | √  | √  | √  | √  | √  | √  | √  | √  | 100.00% |
| Dhup167 | ×  | ×  | ×  | ×  | √  | √  | √  | ×  | ×  | 33.33%  |
| Dhup171 | ×  | ×  | ×  | ×  | ×  | ×  | √  | ×  | ×  | 11.11%  |
| Dhup181 | √  | ×  | √  | ×  | √  | √  | √  | √  | ×  | 66.67%  |
| Dhup183 | ×  | ×  | ×  | ×  | ×  | √  | √  | ×  | ×  | 22.22%  |
| Dhup185 | ×  | √  | √  | ×  | ×  | √  | √  | √  | √  | 66.67%  |
| Dhup191 | ×  | ×  | ×  | ×  | ×  | ×  | √  | ×  | ×  | 11.11%  |
| Dhup194 | ×  | ×  | √  | ×  | √  | ×  | √  | ×  | ×  | 33.33%  |
| Total   | 20 | 18 | 18 | 16 | 23 | 22 | 26 | 16 | 15 | -       |

‘√’ indicated expected amplicon is present; ‘×’ indicated expected amplicon is absent.

**Table S2. Parameters of genetic diversity for *D. hupeana* populations at loci level**

| Locus   | DJY (n=30)           |                      |          |                      |                      |                       |       | JY (n=30)            |                      |          |                      |                      |                       |       | XX (n=30)            |                      |          |                      |                      |                       |       |
|---------|----------------------|----------------------|----------|----------------------|----------------------|-----------------------|-------|----------------------|----------------------|----------|----------------------|----------------------|-----------------------|-------|----------------------|----------------------|----------|----------------------|----------------------|-----------------------|-------|
|         | <i>N<sub>a</sub></i> | <i>N<sub>e</sub></i> | <i>I</i> | <i>H<sub>o</sub></i> | <i>H<sub>e</sub></i> | <i>uH<sub>e</sub></i> | PIC   | <i>N<sub>a</sub></i> | <i>N<sub>e</sub></i> | <i>I</i> | <i>H<sub>o</sub></i> | <i>H<sub>e</sub></i> | <i>uH<sub>e</sub></i> | PIC   | <i>N<sub>a</sub></i> | <i>N<sub>e</sub></i> | <i>I</i> | <i>H<sub>o</sub></i> | <i>H<sub>e</sub></i> | <i>uH<sub>e</sub></i> | PIC   |
| Dhup14  | 4                    | 2.236                | 0.952    | 0.333                | 0.553                | 0.562                 | 0.471 | 4                    | 3.947                | 1.379    | 0.333                | 0.747                | 0.759                 | 0.699 | 5                    | 4.615                | 1.566    | 0.333                | 0.783                | 0.797                 | 0.748 |
| Dhup61  | 6                    | 3.896                | 1.490    | 0.700                | 0.743                | 0.756                 | 0.703 | 5                    | 2.616                | 1.171    | 0.633                | 0.618                | 0.628                 | 0.567 | 7                    | 5.556                | 1.826    | 0.767                | 0.820                | 0.834                 | 0.797 |
| Dhup64  | 8                    | 5.056                | 1.838    | 0.200                | 0.802                | 0.816                 | 0.780 | 7                    | 4.286                | 1.620    | 0.400                | 0.767                | 0.780                 | 0.733 | 10                   | 5.143                | 1.910    | 0.367                | 0.806                | 0.819                 | 0.784 |
| Dhup70  | 4                    | 1.522                | 0.684    | 0.067                | 0.343                | 0.349                 | 0.321 | 5                    | 1.915                | 0.959    | 0.167                | 0.478                | 0.486                 | 0.446 | 6                    | 1.895                | 0.960    | 0.167                | 0.472                | 0.480                 | 0.435 |
| Dhup78  | 6                    | 4.091                | 1.525    | 0.667                | 0.756                | 0.768                 | 0.716 | 8                    | 5.128                | 1.812    | 0.967                | 0.805                | 0.819                 | 0.779 | 9                    | 6.250                | 1.950    | 0.933                | 0.840                | 0.854                 | 0.820 |
| Dhup89  | 9                    | 4.905                | 1.801    | 0.133                | 0.796                | 0.810                 | 0.768 | 6                    | 4.545                | 1.624    | 0.533                | 0.780                | 0.793                 | 0.747 | 10                   | 7.895                | 2.154    | 0.133                | 0.873                | 0.888                 | 0.860 |
| Dhup90  | 7                    | 4.390                | 1.647    | 0.633                | 0.772                | 0.785                 | 0.740 | 5                    | 3.220                | 1.312    | 0.533                | 0.689                | 0.701                 | 0.634 | 10                   | 4.206                | 1.758    | 0.567                | 0.762                | 0.775                 | 0.737 |
| Dhup104 | 6                    | 2.773                | 1.253    | 0.100                | 0.639                | 0.650                 | 0.582 | 9                    | 2.752                | 1.426    | 0.167                | 0.637                | 0.647                 | 0.608 | 9                    | 3.061                | 1.436    | 0.100                | 0.673                | 0.685                 | 0.618 |
| Dhup106 | 12                   | 6.377                | 2.101    | 0.538                | 0.843                | 0.860                 | 0.826 | 13                   | 6.897                | 2.189    | 0.333                | 0.855                | 0.869                 | 0.840 | 18                   | 6.122                | 2.380    | 0.300                | 0.837                | 0.851                 | 0.828 |
| Dhup108 | 6                    | 4.317                | 1.603    | 0.467                | 0.768                | 0.781                 | 0.736 | 12                   | 7.759                | 2.233    | 0.200                | 0.871                | 0.886                 | 0.858 | 7                    | 4.986                | 1.746    | 0.533                | 0.799                | 0.813                 | 0.772 |
| Dhup114 | 5                    | 2.123                | 1.023    | 0.367                | 0.529                | 0.538                 | 0.487 | 4                    | 1.734                | 0.722    | 0.300                | 0.423                | 0.431                 | 0.358 | 7                    | 3.279                | 1.447    | 0.267                | 0.695                | 0.707                 | 0.658 |
| Dhup115 | 6                    | 2.799                | 1.294    | 0.500                | 0.643                | 0.654                 | 0.599 | 5                    | 3.000                | 1.240    | 0.467                | 0.667                | 0.678                 | 0.607 | 10                   | 6.691                | 2.099    | 0.600                | 0.851                | 0.865                 | 0.836 |
| Dhup116 | 6                    | 3.125                | 1.323    | 0.733                | 0.680                | 0.692                 | 0.625 | 6                    | 2.490                | 1.266    | 0.667                | 0.598                | 0.608                 | 0.567 | 5                    | 3.025                | 1.306    | 0.600                | 0.669                | 0.681                 | 0.625 |
| Dhup118 | 4                    | 1.636                | 0.766    | 0.333                | 0.389                | 0.395                 | 0.361 | 4                    | 1.575                | 0.723    | 0.333                | 0.365                | 0.371                 | 0.339 | 5                    | 2.086                | 1.045    | 0.167                | 0.521                | 0.529                 | 0.489 |
| Dhup120 | 6                    | 3.543                | 1.434    | 0.400                | 0.718                | 0.730                 | 0.673 | 8                    | 4.045                | 1.671    | 0.367                | 0.753                | 0.766                 | 0.721 | 8                    | 5.325                | 1.810    | 0.500                | 0.812                | 0.826                 | 0.786 |
| Dhup122 | 4                    | 1.647                | 0.791    | 0.367                | 0.393                | 0.399                 | 0.370 | 3                    | 2.299                | 0.937    | 0.467                | 0.565                | 0.575                 | 0.489 | 7                    | 2.736                | 1.283    | 0.400                | 0.634                | 0.645                 | 0.580 |
| Dhup123 | 6                    | 3.982                | 1.496    | 0.533                | 0.749                | 0.762                 | 0.705 | 4                    | 2.866                | 1.198    | 0.267                | 0.651                | 0.662                 | 0.597 | 11                   | 6.081                | 2.008    | 0.667                | 0.836                | 0.850                 | 0.816 |
| Dhup125 | 7                    | 4.091                | 1.555    | 0.533                | 0.756                | 0.768                 | 0.715 | 6                    | 3.346                | 1.399    | 0.200                | 0.701                | 0.713                 | 0.657 | 7                    | 3.905                | 1.608    | 0.267                | 0.744                | 0.756                 | 0.715 |
| Dhup129 | 2                    | 1.342                | 0.423    | 0.233                | 0.255                | 0.259                 | 0.222 | 3                    | 1.462                | 0.603    | 0.267                | 0.316                | 0.321                 | 0.293 | 6                    | 1.603                | 0.862    | 0.300                | 0.376                | 0.382                 | 0.363 |
| Dhup130 | 8                    | 5.422                | 1.846    | 0.367                | 0.816                | 0.829                 | 0.792 | 5                    | 4.119                | 1.518    | 0.100                | 0.757                | 0.770                 | 0.722 | 15                   | 8.911                | 2.391    | 0.433                | 0.888                | 0.903                 | 0.878 |
| Dhup132 | 9                    | 6.102                | 1.972    | 0.500                | 0.836                | 0.850                 | 0.817 | 7                    | 3.482                | 1.572    | 0.433                | 0.713                | 0.725                 | 0.686 | 13                   | 7.087                | 2.199    | 0.533                | 0.859                | 0.873                 | 0.845 |
| Dhup133 | 16                   | 6.923                | 2.300    | 0.467                | 0.856                | 0.870                 | 0.842 | 17                   | 10.651               | 2.573    | 0.767                | 0.906                | 0.921                 | 0.899 | 13                   | 6.122                | 2.146    | 0.433                | 0.837                | 0.851                 | 0.821 |
| Dhup139 | 4                    | 2.667                | 1.166    | 0.433                | 0.625                | 0.636                 | 0.578 | 5                    | 2.659                | 1.153    | 0.500                | 0.624                | 0.634                 | 0.562 | 6                    | 3.607                | 1.452    | 0.433                | 0.723                | 0.735                 | 0.679 |

|         |       |       |       |       |       |       |       |       |       |       |       |       |       |       |       |        |       |       |       |       |       |
|---------|-------|-------|-------|-------|-------|-------|-------|-------|-------|-------|-------|-------|-------|-------|-------|--------|-------|-------|-------|-------|-------|
| Dhup141 | 5     | 2.476 | 1.102 | 0.633 | 0.596 | 0.606 | 0.533 | 4     | 2.786 | 1.106 | 0.467 | 0.641 | 0.652 | 0.569 | 5     | 2.013  | 1.035 | 0.267 | 0.503 | 0.512 | 0.475 |
| Dhup142 | 5     | 1.472 | 0.691 | 0.033 | 0.321 | 0.326 | 0.304 | 3     | 1.985 | 0.779 | 0.100 | 0.496 | 0.505 | 0.402 | 6     | 2.105  | 1.005 | 0.100 | 0.525 | 0.534 | 0.465 |
| Dhup144 | 7     | 3.888 | 1.578 | 0.267 | 0.743 | 0.755 | 0.709 | 8     | 4.286 | 1.702 | 0.267 | 0.767 | 0.780 | 0.736 | 10    | 7.258  | 2.119 | 0.433 | 0.862 | 0.877 | 0.848 |
| Dhup153 | 13    | 7.087 | 2.215 | 0.833 | 0.859 | 0.873 | 0.845 | 12    | 5.471 | 2.060 | 0.800 | 0.817 | 0.831 | 0.800 | 15    | 10.465 | 2.502 | 0.800 | 0.904 | 0.920 | 0.897 |
| Dhup159 | 8     | 4.176 | 1.641 | 0.500 | 0.761 | 0.773 | 0.724 | 6     | 1.833 | 0.937 | 0.233 | 0.454 | 0.462 | 0.421 | 9     | 3.147  | 1.479 | 0.167 | 0.682 | 0.694 | 0.637 |
| Dhup163 | 6     | 3.564 | 1.442 | 0.400 | 0.719 | 0.732 | 0.674 | 7     | 3.600 | 1.568 | 0.633 | 0.722 | 0.734 | 0.694 | 9     | 5.357  | 1.896 | 0.800 | 0.813 | 0.827 | 0.792 |
| Dhup164 | 5     | 2.975 | 1.243 | 0.600 | 0.664 | 0.675 | 0.605 | 4     | 2.980 | 1.170 | 0.267 | 0.664 | 0.676 | 0.597 | 4     | 3.030  | 1.202 | 0.400 | 0.670 | 0.681 | 0.610 |
| Dhup167 | 7     | 2.956 | 1.312 | 0.633 | 0.662 | 0.673 | 0.603 | 5     | 2.616 | 1.189 | 0.767 | 0.618 | 0.628 | 0.567 | 4     | 3.010  | 1.233 | 0.400 | 0.668 | 0.679 | 0.617 |
| Dhup171 | 5     | 3.035 | 1.288 | 0.100 | 0.671 | 0.682 | 0.618 | 4     | 2.667 | 1.127 | 0.200 | 0.625 | 0.636 | 0.559 | 6     | 4.455  | 1.600 | 0.233 | 0.776 | 0.789 | 0.741 |
| Dhup181 | 6     | 3.220 | 1.394 | 0.500 | 0.689 | 0.701 | 0.646 | 6     | 4.511 | 1.602 | 0.400 | 0.778 | 0.792 | 0.745 | 7     | 4.511  | 1.665 | 0.367 | 0.778 | 0.792 | 0.746 |
| Dhup183 | 7     | 2.871 | 1.422 | 0.600 | 0.652 | 0.663 | 0.623 | 5     | 1.471 | 0.682 | 0.167 | 0.320 | 0.325 | 0.303 | 14    | 3.814  | 1.809 | 0.433 | 0.738 | 0.750 | 0.712 |
| Dhup185 | 13    | 6.522 | 2.246 | 0.367 | 0.847 | 0.861 | 0.836 | 10    | 5.960 | 1.976 | 0.600 | 0.832 | 0.846 | 0.812 | 15    | 5.941  | 2.182 | 0.367 | 0.832 | 0.846 | 0.817 |
| Dhup191 | 6     | 4.176 | 1.608 | 0.233 | 0.761 | 0.773 | 0.731 | 6     | 3.321 | 1.448 | 0.367 | 0.699 | 0.711 | 0.664 | 6     | 3.482  | 1.437 | 0.133 | 0.713 | 0.725 | 0.674 |
| Dhup194 | 6     | 3.629 | 1.452 | 0.533 | 0.724 | 0.737 | 0.679 | 5     | 2.880 | 1.265 | 0.433 | 0.653 | 0.664 | 0.606 | 7     | 4.972  | 1.745 | 0.200 | 0.799 | 0.812 | 0.771 |
| Mean    | 6.757 | 3.703 | 1.430 | 0.428 | 0.674 | 0.685 | 0.637 | 6.378 | 3.599 | 1.376 | 0.408 | 0.659 | 0.670 | 0.618 | 8.676 | 4.696  | 1.682 | 0.403 | 0.740 | 0.752 | 0.711 |

Note:  $N_a$ = number of alleles,  $N_e$ = effective number of alleles,  $I$ =Shannon's information index,  $H_o$ =observed heterozygosity,  $H_e$ =expected heterozygosity,  $uH_e$ = unbiased expected heterozygosity  
PIC=polyomorphic information content.

**Table S3. Parameters of genetic diversity for *D. balansae* and *D. polyadelpha* populations at loci level**

| Locus   | <i>D. balansae</i> (n=27) |        |       |       |       |        |       | Locus          | <i>D. polyadelpha</i> (n=27) |       |       |       |       |        |       |
|---------|---------------------------|--------|-------|-------|-------|--------|-------|----------------|------------------------------|-------|-------|-------|-------|--------|-------|
|         | $N_a$                     | $N_e$  | $I$   | $H_o$ | $H_e$ | $uH_e$ | PIC   |                | $N_a$                        | $N_e$ | $I$   | $H_o$ | $H_e$ | $uH_e$ | PIC   |
| Dhup14  | 4                         | 1.417  | 0.616 | 0.185 | 0.294 | 0.300  | 0.278 | <i>Dhup14</i>  | 3                            | 1.303 | 0.463 | 0.259 | 0.233 | 0.237  | 0.217 |
| Dhup61  | 6                         | 4.109  | 1.546 | 0.885 | 0.757 | 0.771  | 0.720 | <i>Dhup61</i>  | 4                            | 2.348 | 1.032 | 0.704 | 0.574 | 0.585  | 0.509 |
| Dhup64  | 9                         | 4.812  | 1.810 | 0.407 | 0.792 | 0.807  | 0.765 | <i>Dhup64</i>  | 5                            | 3.233 | 1.317 | 0.444 | 0.691 | 0.704  | 0.641 |
| Dhup70  | 4                         | 1.655  | 0.759 | 0.111 | 0.396 | 0.403  | 0.363 | <i>Dhup70</i>  | 3                            | 1.078 | 0.184 | 0.074 | 0.072 | 0.073  | 0.071 |
| Dhup78  | -                         | -      | -     | -     | -     | -      | -     | <i>Dhup78</i>  | 2                            | 1.117 | 0.215 | 0.037 | 0.105 | 0.107  | 0.099 |
| Dhup90  | 8                         | 3.953  | 1.610 | 0.769 | 0.747 | 0.762  | 0.709 | <i>Dhup90</i>  | 3                            | 2.219 | 0.868 | 0.852 | 0.549 | 0.560  | 0.448 |
| Dhup104 | 15                        | 6.910  | 2.320 | 0.556 | 0.855 | 0.871  | 0.845 | <i>Dhup104</i> | 10                           | 7.839 | 2.138 | 0.519 | 0.872 | 0.889  | 0.859 |
| Dhup108 | 15                        | 11.267 | 2.543 | 0.846 | 0.911 | 0.929  | 0.904 | <i>Dhup108</i> | 5                            | 2.585 | 1.106 | 0.519 | 0.613 | 0.625  | 0.542 |
| Dhup114 | 9                         | 2.730  | 1.453 | 0.185 | 0.634 | 0.646  | 0.609 | <i>Dhup114</i> | 11                           | 5.855 | 1.988 | 0.630 | 0.829 | 0.845  | 0.808 |
| Dhup116 | 10                        | 4.220  | 1.828 | 0.542 | 0.763 | 0.779  | 0.744 | <i>Dhup116</i> | 11                           | 4.571 | 1.827 | 0.333 | 0.781 | 0.796  | 0.752 |
| Dhup118 | 4                         | 3.336  | 1.279 | 0.630 | 0.700 | 0.713  | 0.646 | <i>Dhup118</i> | -                            | -     | -     | -     | -     | -      | -     |
| Dhup120 | 8                         | 5.896  | 1.897 | 0.640 | 0.830 | 0.847  | 0.809 | <i>Dhup120</i> | 1                            | 1.000 | 0.000 | 0.000 | 0.000 | 0.000  | 0.000 |
| Dhup122 | 6                         | 3.025  | 1.321 | 0.704 | 0.669 | 0.682  | 0.616 | <i>Dhup122</i> | 14                           | 9.000 | 2.375 | 0.222 | 0.889 | 0.906  | 0.879 |
| Dhup123 | 5                         | 3.347  | 1.386 | 0.654 | 0.701 | 0.715  | 0.660 | <i>Dhup123</i> | -                            | -     | -     | -     | -     | -      | -     |
| Dhup129 | 5                         | 1.474  | 0.681 | 0.259 | 0.322 | 0.328  | 0.302 | <i>Dhup129</i> | 4                            | 1.520 | 0.660 | 0.259 | 0.342 | 0.349  | 0.312 |
| Dhup139 | 5                         | 2.735  | 1.218 | 0.444 | 0.634 | 0.646  | 0.587 | <i>Dhup139</i> | 4                            | 2.976 | 1.149 | 0.556 | 0.664 | 0.676  | 0.596 |
| Dhup141 | 7                         | 3.941  | 1.572 | 0.704 | 0.746 | 0.760  | 0.709 | <i>Dhup141</i> | 7                            | 4.796 | 1.704 | 0.704 | 0.791 | 0.806  | 0.762 |
| Dhup144 | 8                         | 5.729  | 1.878 | 0.577 | 0.825 | 0.842  | 0.803 | <i>Dhup144</i> | 2                            | 1.202 | 0.308 | 0.037 | 0.168 | 0.171  | 0.154 |
| Dhup159 | 4                         | 1.457  | 0.598 | 0.370 | 0.313 | 0.319  | 0.283 | <i>Dhup159</i> | -                            | -     | -     | -     | -     | -      | -     |
| Dhup163 | -                         | -      | -     | -     | -     | -      | -     | <i>Dhup163</i> | 8                            | 4.942 | 1.754 | 0.778 | 0.798 | 0.813  | 0.769 |
| Dhup164 | 3                         | 1.818  | 0.774 | 0.074 | 0.450 | 0.458  | 0.395 | <i>Dhup164</i> | 3                            | 1.818 | 0.774 | 0.370 | 0.450 | 0.458  | 0.395 |
| Dhup167 | 4                         | 1.634  | 0.724 | 0.120 | 0.388 | 0.396  | 0.348 | <i>Dhup167</i> | 5                            | 3.149 | 1.331 | 0.889 | 0.682 | 0.695  | 0.638 |
| Dhup171 | 6                         | 2.599  | 1.205 | 0.519 | 0.615 | 0.627  | 0.558 | <i>Dhup171</i> | -                            | -     | -     | -     | -     | -      | -     |

|         |       |       |       |       |       |       |       |                |       |       |       |       |       |       |       |
|---------|-------|-------|-------|-------|-------|-------|-------|----------------|-------|-------|-------|-------|-------|-------|-------|
| Dhup181 | 10    | 5.341 | 1.932 | 0.481 | 0.813 | 0.828 | 0.790 | <i>Dhup181</i> | 2     | 1.202 | 0.308 | 0.111 | 0.168 | 0.171 | 0.154 |
| Dhup183 | 6     | 1.846 | 0.978 | 0.360 | 0.458 | 0.468 | 0.434 | <i>Dhup183</i> | 2     | 1.957 | 0.682 | 0.407 | 0.489 | 0.498 | 0.369 |
| Dhup185 | 9     | 5.297 | 1.889 | 0.640 | 0.811 | 0.828 | 0.789 | <i>Dhup185</i> | 3     | 2.039 | 0.764 | 0.074 | 0.510 | 0.519 | 0.397 |
| Dhup191 | 7     | 3.407 | 1.516 | 0.407 | 0.706 | 0.720 | 0.675 | <i>Dhup191</i> | -     | -     | -     | -     | -     | -     | -     |
| Dhup194 | 6     | 1.633 | 0.825 | 0.077 | 0.388 | 0.395 | 0.363 | <i>Dhup194</i> | -     | -     | -     | -     | -     | -     | -     |
| Mean    | 7.038 | 3.676 | 1.391 | 0.467 | 0.635 | 0.648 | 0.604 | Mean           | 5.091 | 3.079 | 1.043 | 0.399 | 0.512 | 0.522 | 0.471 |

Note:  $N_a$ = number of alleles,  $N_e$ = effective number of alleles,  $I$ =Shannon's information index,  $H_o$ =observed heterozygosity,  $H_e$ =expected heterozygosity,  $uH_e$ = unbiased expected heterozygosity  
PIC=polymorphic information content.
